# Supplementary material
Source: ML conference proceedings conference paper supplement (https://proceedings.neurips.cc/paper_files/paper/2022/hash/211ab571cc9f3802afa6ffff52ae3e5b-Abstract.html)
Supplement: Supplementary file 1 [file 211ab571cc9f3802afa6ffff52ae3e5b-Supplemental-Conference.zip]

Archive with 2 entries (2 files):
- supp.pdf
- MPRG_code.zip
